# Supplementary material for: Copper molybdenum sulfide (Cu2MoS4) nanoplates as a proficient electrocatalytic interface for enhancing the electrochemical redox signals of ofloxacin for detection in pharmaceutical samples
Source: Royal Society of Chemistry journal article supplement (doi:10.1039/d2nj06098a), 2023-01-01
Supplement: d2nj06098a1.pdf [file d2nj06098a1.pdf]

Supporting information for

**Copper molybdenum sulfide (Cu<sub>2</sub>MoS<sub>4</sub>) nanoplates as a proficient electrocatalytic interface for enhancing electrochemical redox signals of Ofloxacin detection in pharmaceutical samples**

Thi Lan Huong Phung<sup>a,b</sup>, Ngoc Phan Vu<sup>a,c</sup>, Tuan Anh Nguyen<sup>a</sup>, Ngoc Huyen Nguyen<sup>a</sup>, Xuan Dinh Ngo<sup>a,\*</sup>, Van Hoi Bui<sup>d</sup>, Ly T. Le<sup>d</sup> and Anh D. Nguyen<sup>d,\*\*</sup>, Anh-Tuan Le<sup>a,e</sup>

<sup>a</sup>Phenikaa University Nano Institute (PHENA), Phenikaa University, Hanoi 12116, Vietnam

<sup>b</sup>Graduate University of Science and Technology, Vietnam Academy of Science and Technology, 18 Hoang Quoc Viet, Ha Noi 12116, Vietnam

<sup>c</sup>Faculty of Biotechnology, Chemistry and Environmental Engineering, Phenikaa University, Ha Noi 12116, Vietnam

<sup>d</sup>University of Science and Technology of Hanoi, Vietnam Academy of Science and Technology, 18 Hoang Quoc Viet, Hanoi 12116, Vietnam.

<sup>e</sup>Faculty of Materials Science and Engineering, Phenikaa University, Hanoi 12116, Vietnam

Corresponding authors:

[\\*dinh.ngoxuan@phenikaa-uni.edu.vn](mailto:dinh.ngoxuan@phenikaa-uni.edu.vn) (N.X. Dinh)

[\\*\\* nguyen-duc.anh@usth.edu.vn](mailto:nguyen-duc.anh@usth.edu.vn) (Duc Anh Nguyen)

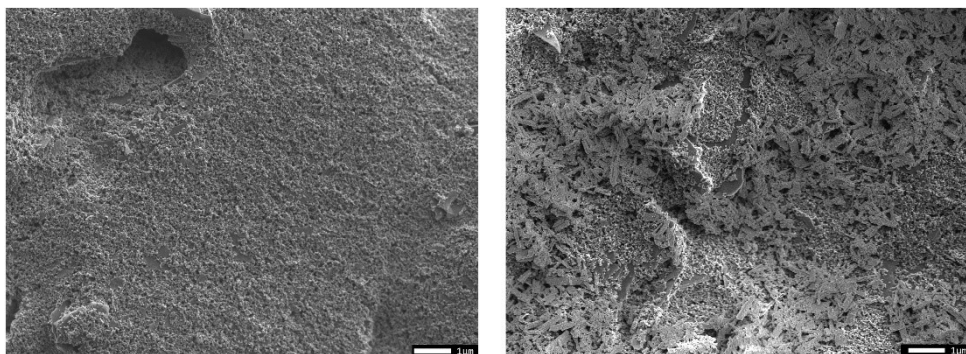

**Fig. S1.** SEM images of screen-printed electrodes before and after CMS modification.

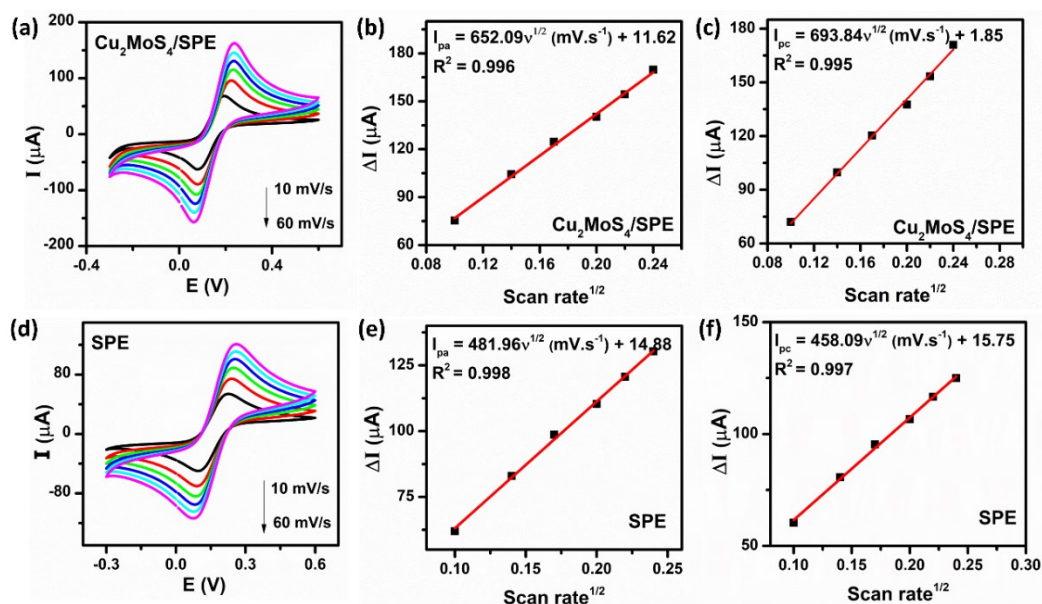

**Fig. S2.** CV curves recorded of un-modified and CMS-modified electrodes with various scan rates from 10 to 60  $\text{mV s}^{-1}$  (a, d) and the corresponding calibration plots of peak current response vs. square root of scan rate (b-c, e-f).

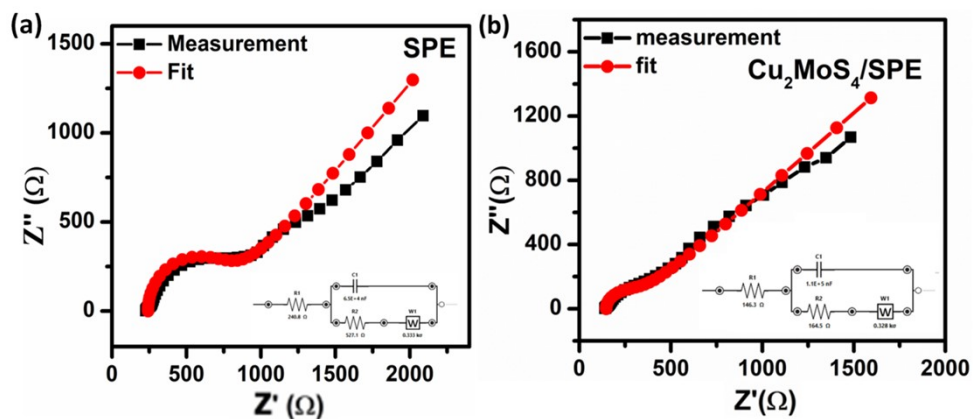

**Fig. S3.** Fitted and experimental Nyquist plots of impedance spectra. The red line is calculated results from model fitting, and the black line is experimental data. The inset shows the Randles equivalent circuit used for fitting the data.

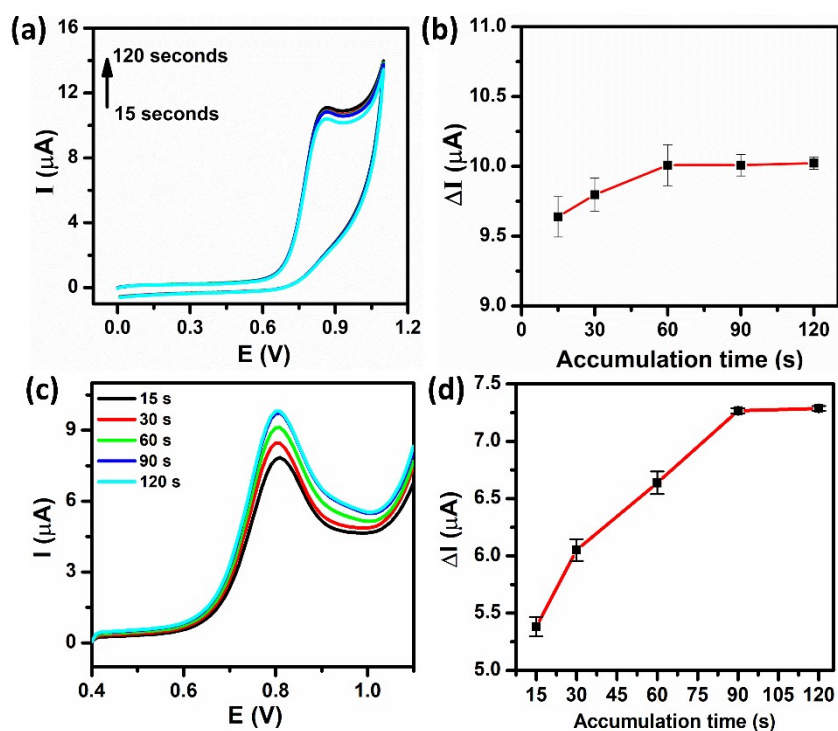

**Fig. S4.** Effect of accumulation time on OFX electrochemical oxidation of CMS/SPE.

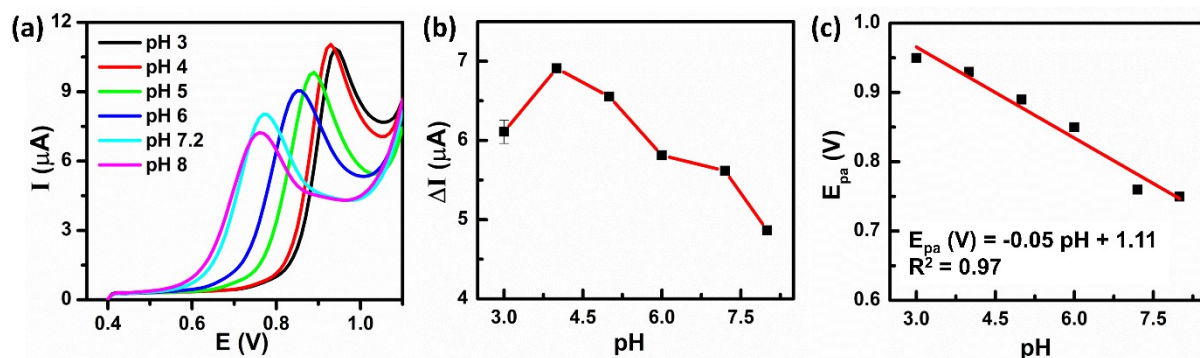

**Fig. S5.** DPV curves of CMS/SPE in 50  $\mu\text{M}$  OFX at various pH values (a), corresponding to the plots of peak current and peak potential vs. pH value (b, c) with error bars.

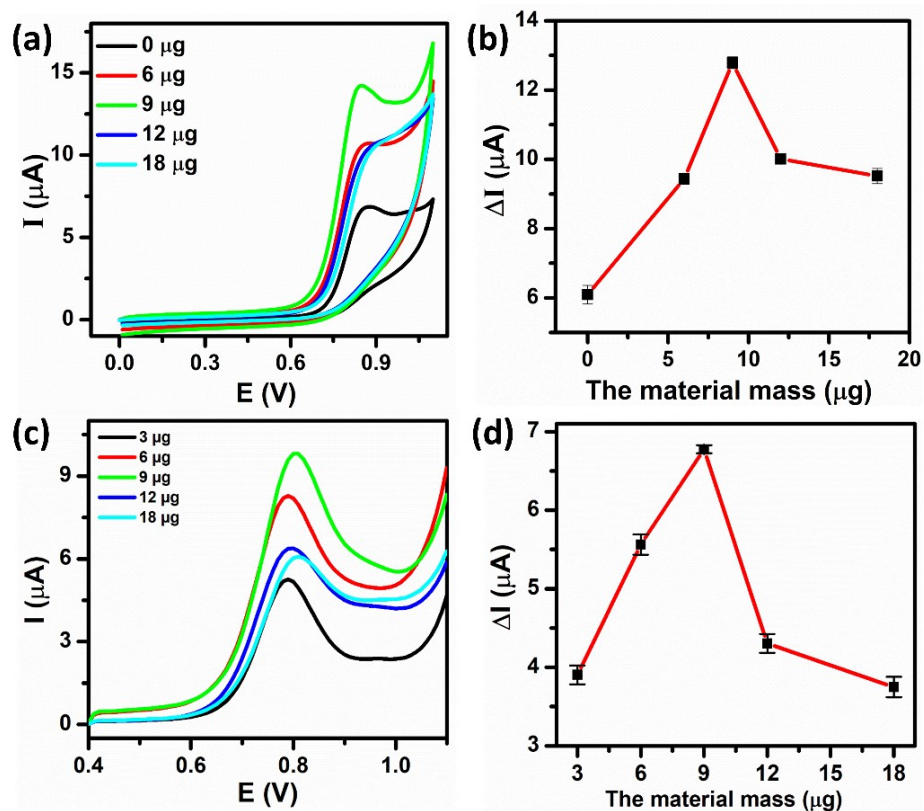

**Fig. S6** Effect of modifier amount on OFX electrochemical oxidation of CMS/SPE.

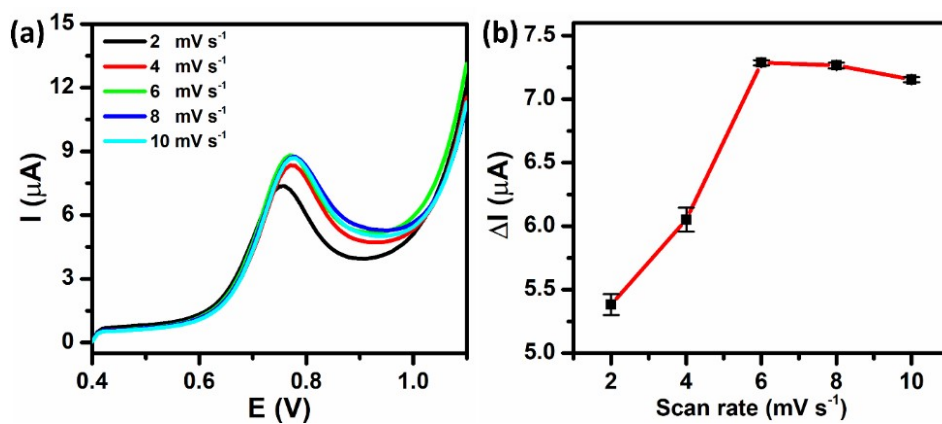

**Fig. S7** Effect of scan rate on OFX electrochemical oxidation of CMS/SPE.

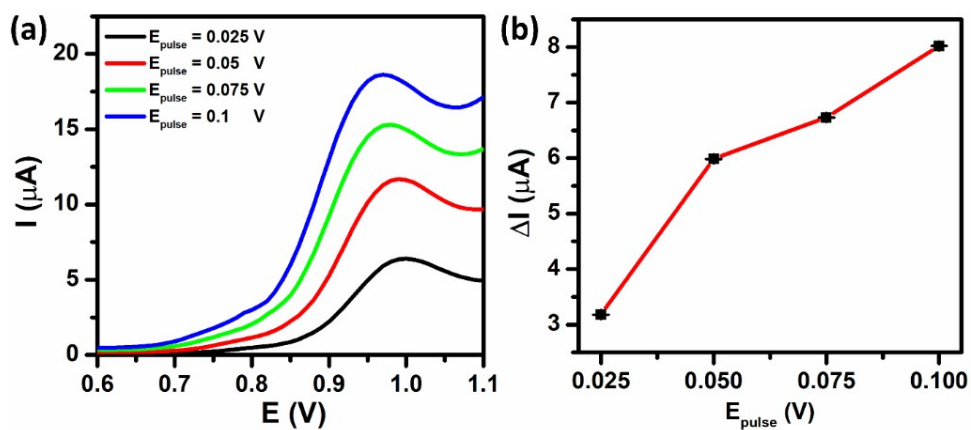

**Fig. S8.** Effect of pulse potential on OFX electrochemical oxidation of CMS/SPE.

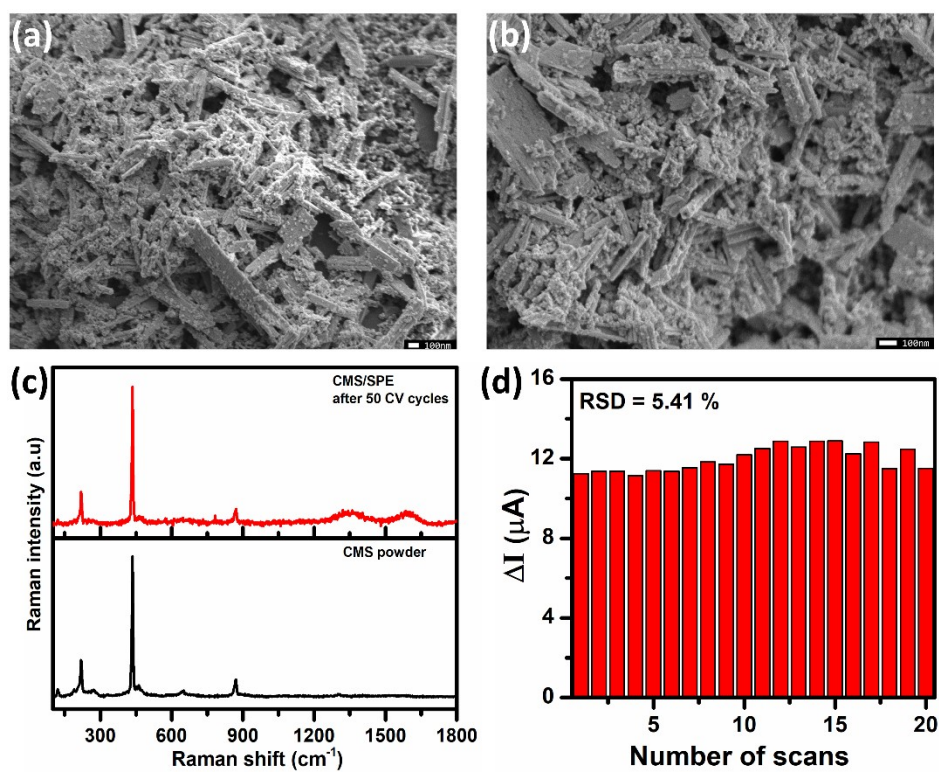

**Fig. S9.** Stability and repeatability of CMS-modified electrode.

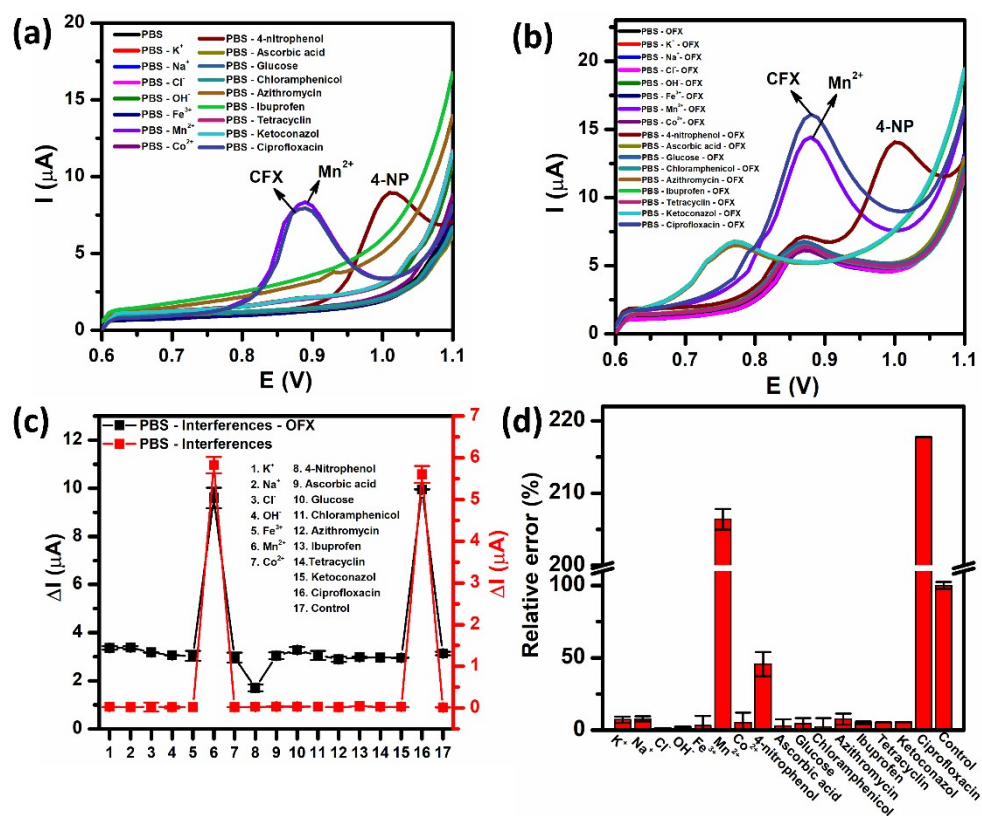

Fig. S10. Interference investigation of the CMS-modified electrodes with the 4-fold concentration of interference substances.

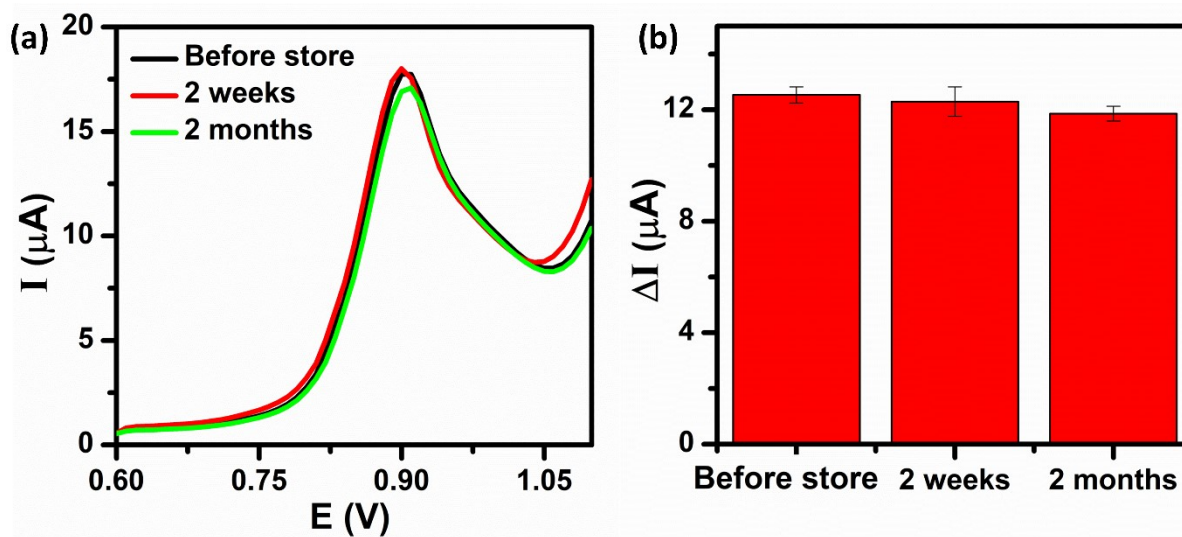

Fig. S11. Long-term stability of CMS-modified electrodes.

**Table S1.** Some previously analytical methods for OFX detection

| <b>Detection method</b>             | <b>Analytical ranges (<math>\mu\text{M}</math>)</b> | <b>LOD (nM)</b> | <b>Real samples</b> | <b>Ref.</b> |
|-------------------------------------|-----------------------------------------------------|-----------------|---------------------|-------------|
| Photoelectrochemical                | 1– 100                                              | 906             | -                   | [1]         |
| Capillary electrophoresis           | 1.4– 28                                             | 102             | Tissue              | [2]         |
| Spectrofluorimetric                 | 0.075 – 3.75                                        | 50              | Milk<br>Domestic    | [3]         |
| Solid-phase<br>spectrofluorimetric  | 0.140 – 1.269                                       | 33.6            | Plasma<br>Urine     | [4]         |
| HPLC with fluorescence<br>detection | 0.028 – 280                                         | 28              | Aqueous<br>vitreous | [5]         |

## References

- [1] S. Adhikari, D.-H. Kim, Synthesis of Bi<sub>2</sub>S<sub>3</sub>/Bi<sub>2</sub>WO<sub>6</sub> hierarchical microstructures for enhanced visible light driven photocatalytic degradation and photoelectrochemical sensing of ofloxacin, *Chem. Eng. J.* 354 (2018) 692–705.
- [2] H. Sun, P. He, Y. Lv, S. Liang, Effective separation and simultaneous determination of seven fluoroquinolones by capillary electrophoresis with diode-array detector, *J. Chromatogr. B.* 852 (2007) 145–151.
- [3] Y. Zhu, Y. Lu, L. Shi, Y. Yang,  $\beta$ -Cyclodextrin functionalized N, Zn codoped carbon dots for specific fluorescence detection of fluoroquinolones in milk samples, *Microchem. J.* 153 (2020) 104517.
- [4] M. Amoli-Diva, K. Pourghazi, S. Hajjarian, Dispersive micro-solid phase extraction using magnetic nanoparticle modified multi-walled carbon nanotubes coupled with surfactant-enhanced spectrofluorimetry for sensitive determination of lomefloxacin and ofloxacin from biological samples, *Mater. Sci. Eng. C.* 60 (2016) 30–36.
- [5] K.P. Chan, K.O. Chu, W.W.-K. Lai, K.W. Choy, C.C. Wang, D.S.-C. Lam, C.P. Pang, Determination of ofloxacin and moxifloxacin and their penetration in human aqueous and vitreous humor by using high-performance liquid chromatography fluorescence detection, *Anal. Biochem.* 353 (2006) 30–36.
